# Supplementary material
Source: Research Square preprint supplement (doi:10.21203/rs.3.rs-8788398/v1)
Supplement: Supplementary file 1 [file 4099c1bcf545307893bd9a51.docx]

**Supplementary materials and methods**

**Cell Counting Kit-8 (CCK-8)**

Approximately 1000 PCa cells were seeded into 96-well plate for culture until adhered. Cell Counting Kit-8 (APExBIO, USA) stock solution (10 ul) was added to each well and cultured for 2 hours at 37℃ with 5% CO2, and then the absorbance value at 450 nm for each well was measured through Spark 10M (Tecan, Austria). Following this process to continuously examine for 5 days and the growth index was calculated.

**Clonogenic survival assay**

Cells were harvested and counted, approximately 1000 cells were seeded in 6-well plate and cultured for three weeks. Washed cells with 1x PBS for three times and with 4% paraformaldehyde (Servicebio, Wuhan, China). Staining cells with 0.1% crystal violet for 15min at the room temperature, washed cells with 1x PBS for three times and then drying naturally. Clones were photographed and analyzed with AID vSpot Spectrum (AID, Germany).

**Plasmid construction and transfection**

The oligonucleotides sequence of shRNA are shown in Supplementary Table 1. The GFP-Flag-KIF20A overexpression plasmid and serious trunked plasmids, Myc-G3BP1 overexpression plasmid, His-USP15 overexpression plasmid, HA-Ub plasmid, K5/K393/K453 plasmids and corresponding empty vector was constructed by IGE BIO (Guangzhou, China). Transfecting method was described as previous study[45].

**Ubiquitination assay**

HEK-293T cells were cultured and transfected with the indicated plasmids, then treating cells with 20 μM MG132 for 8 h before harvested. Cells were lysed with Western blot and IP lysis buffer (Beyotime, P0013, Shanghai, China) supplemented with protease inhibitors. The lysates were incubated with specific primary antibodies for 12 h at 4 °C and then incubated with Protein A/G magnetic beads for 2 h at room temperature. The protein-beads complex was boiled in SDS-PAGE loading buffer for 10 min and then expression of targets were detected through western blot assay.

**RNA isolation and Real-time quantitative PCR**

Cells were harvested and the extraction of total RNA was performed according to the portocol of RNA-Quick Purification Kit (YiShan Biotech, Shanghai, China). cDNA synthesis was performed by using the HiScript II Q RT SuperMix (Vazyme, R223-01, China). The amplification of cDNA was performed by using ChamQ SYBR qPCR Master Mix (Vazyme, Q311-02, China). The 2−ΔΔCT was utilized to calculate the relative gene expression of target genes. GAPDH was used as a loading control. The primers used in this study are listed in Supplementary Table 2.
