# Supplementary material
Source: Research Square preprint supplement (doi:10.21203/rs.3.rs-8788398/v1)
Supplement: Supplementary file 2 [file 782f75ee7939a18cbb50f285.docx]

The oligonucleotides used in this study are listed as follows.

| Oligonucleotides | Sequence (5’-3’) |
| --- | --- |
| si-NC sense | UUCUCCGAACGUGUCACGUTT |
| si-NC antisense | ACGUGACACGUUCGGAGAATT |
| si-KIF20A#1 sense | GCAUCCUUCUUCAACCUAATT |
| si-KIF20A #1 antisense | UUAGGUUGAAGAAGGAUGCTT |
| si-KIF20A #2 sense | GGAUCUCAUUCUUUGAGAUTT |
| si-KIF20A #2 antisense | AUCUCAAAGAAUGAGAUCCTT |
| sh-KIF20A #1 sense | GCAUCCUUCUUCAACCUAATT |
| sh-KIF20A #1 antisense | UUAGGUUGAAGAAGGAUGCTT |
| sh-KIF20A #2 sense | GGAUCUCAUUCUUUGAGAUTT |
| sh-KIF20A #2 antisense | AUCUCAAAGAAUGAGAUCCTT |
| si-NC sense | UUCUCCGAACGUGUCACGUTT |
| si-NC antisense | ACGUGACACGUUCGGAGAATT |
| si-G3BP1#1 sense | CCGGCGGGAATTTGTGAGACAGTATCTCGAGATACTGTCT CACAAATTCCCGTTTTTG |
| si-G3BP1#1 antisense | AATTCAAAAACGGGAATTTGTGAGACAGTATCTCGAGATA CTGTCTCACAAATTCCCG |
| si-G3BP1#2 sense | CCGGCCACCTCATGTTGTTAAAGTACTCGAGTACTTTAACA ACATGAGGTGGTTTTTG |
| si-G3BP1#2 antisense | AATTCAAAAACCACCTCATGTTGTTAAAGTACTCGAGTACT TTAACAACATGAGGTGG |
| si-USP15#1 sense | GCACGTGATTATTCCTGTT |
| si-USP15#1 antisense | AACAGGAATAATCACGTGC |
| si-USP15#2 sense | GGTTGGAATTAACTTGTCA |
| si-USP15#2 antisense | TGACAAGTTAATTCCAACC |
