# Supplementary material
Source: Research Square preprint supplement (doi:10.21203/rs.3.rs-8788398/v1)
Supplement: Supplementary file 3 [file a719bd2cfb6e9291ace58442.docx]

The primers used in this study are listed as follows.

| Primers | Sequence (5’-3’) |
| --- | --- |
| *KIF20A* Forward | CAAGAGGCAGACTTTGCGGCTA |
| *KIF20A* Reverse | GCTCTGGTTCTTACGACCCACT |
| *G3BP1* Forward | AGCCTGTTCAGAAAGTCCTTAGC |
| *G3BP1* Reverse | CGAAGGCGATTATCTCGTCGGT |
| *TCF4* Forward | GCCTCTTCACAGTAGTGCCATG |
| *TCF4* Reverse | GCTGGTTTGGAGGAAGGATAGC |
| *c-Myc* Forward | CCTGGTGCTCCATGAGGAGAC |
| *c-Myc* Reverse | CAGACTCTGACCTTTTGCCAGG |
| *ROCK1* Forward | GAAACAGTGTTCCATGCTAGACG |
| *ROCK1* Reverse | GCCGCTTATTTGATTCCTGCTCC |
| *RHOA* Forward | TCTGTCCCAACGTGCCCATCAT |
| *RHOA* Reverse | CTGCCTTCTTCAGGTTTCACCG |
| *PRKCB* Forward | GAGGGACACATCAAGATTGCCG |
| *PRKCB* Reverse | CACCAATCCACGGACTTCCCAT |
| *CAMKIIA* Forward | GAGCCATTCTCACCACGATGCT |
| *CAMKIIA* Reverse | TGGTGTTGGTGCTCTCTGAGGA |
| *USP15* Forward | CCCTACACTGCTGTAAGGACCA |
| *USP15* Reverse | GAGGGAAGTTCTTGATCCTGGC |
| *GAPDH* Forward | GTCTCCTCTGACTTCAACAGCG |
| *GAPDH* Reverse | ACCACCCTGTTGCTGTAGCCAA |
