# Supplementary material
Source: Research Square preprint supplement (doi:10.21203/rs.3.rs-8788398/v1)
Supplement: Supplementary file 4 [file eeddc73dbafda8d41bd9f0b0.docx]

**Figure S1. KIF20A is upregulated in PCa. A** KIF20A mRNA expression levels was frequently increased in various tumours through analyzing TCGA database. **B-D** KIF20A was up-regulated in PCa patients based on GS. **E** Kaplan-Meier survival analysis of PCa patients based on the expression of KIF20A to evaluate correlation of KIF20A expression and overall survival (OS). Data were presented as mean±SD, **p* < 0.05, ***p* < 0.01, ****p* < 0.001.

**Figure S2. KIF20A promotes the proliferation and doecetaxel resistance of PCa cells in vitro. A-B** Analysis of the apoptosis ratio in KIF20A knock down cells (shKIF20A-1#, shKIF20A-2#) and negative control cells (shNC). **C-D** Analysis of the apoptosis ratio in PC-3 (C) or DU145 (D) cells transfecting with KIF20A overexpressing plasmid or empty vector with or without Docetaxel treatment ( shKIF20A-1# or shKIF20A-2# versus shNC) or overexpression (Vector versus KIF20A). **E** CCK-8 assay was performed to measure the IC50 value of PC-3-DR or PC-3-Parental cells with docetaxel treatment. **F-G** CCK-8 assay was performed to detecte the viability of PC-3-DR cell with KIF20A knock down (F) or overexpression (G). **H** The detect of IC50 value of PC-3-DR cells with KIF20A inhibition following docetexel treatment. **I** Western blot assay was used for the evaluating the expression of relative apoptosismarkers, GAPDH used as loading control. Data were presented as mean±SD, **p* < 0.05, ***p* < 0.01, ****p* < 0.001.

**Figure S3. KIF20A promotes the proliferation and doecetaxel resistance of PCa cells in mice. A-B** The weight of mice was recorded and analyzed in tumor model derived from PC-3 and PC-3-DR cells. **C-D** The statistical analysis of KIF20A expression in PC-3 subcutaneous xenograft tumors at 200×(scale bar: 100 μm) or 400×(scale bar: 50 μm) magnification. **E-F** The statistical analysis of KIF20A expression in PC3-DR subcutaneous xenograft tumors at 200×(scale bar: 100 μm) or 400×(scale bar: 50 μm) magnification. Data were presented as mean±SD, **p* < 0.05, ***p* < 0.01, ****p* < 0.001, ns: not significantly.

**Figure S4. G3BP1 function as essential partner of KIF20A in PCa progression. A-B** The statistical analysis of β-catenin expression in PC-3 (A) and PC3-DR (B) subcutaneous xenograft tumors at 200×(scale bar: 100 μm) or 400×(scale bar: 50 μm) magnification. **C-D** The analysis of IHC socre of β-catenin in PC-3 (C) and PC3-DR (D) subcutaneous xenograft tumors. Data were presented as mean±SD, ***p* < 0.01, ****p* < 0.001.

**Figure S5. USP15 was a vital DUBs for G3BP1 protein stability. A** The positive correction of KIF20A and G3BP1 was analyszed in GEPIA website based on TCGA dataset. **B** Kaplan-Meier survival analysis of PCa patients based on the expression of G3BP1 to evaluate correlation of G3BP1 expression and progression free inverval in GSE70770. **C** Western blotwas perfomed to dectect the expression of G3BP1 in cells with G3BP1 knock down. **D-E** Flow cytometry was used to detect the apoptosis in G3BP1 knock down cells (D), and the relative apoptosis rate was analyzed (E). **F-G** The cell viability was detected in PC-3 and C4-2 cells with G3BP1 knock down. **H** The expression of G3BP1 protein level was detected through western blot assay in KIF20A knock down cells, GAPDH used as loading control. **I** The expression of G3BP1 mRNA level was detected through qRT-PCR assay in KIF20A knock down cells, GAPDH used as loading control. Data were presented as mean±SD, **p* < 0.05, ***p* < 0.01, ****p* < 0.001.

**Figure S6. KIF20A recruits USP15 to reinforce K-63 linked deubiquitinated of G3BP1. A** Reanalysis of the results of MS revealed that KIF20A might interacted with USP15 in PCa cells. **B-C** The positive correction of KIF20A, G3BP1 and USP15 was detected TCGA website. **D** The protein expression of USP15 was detected in USP15 knock down cells, GAPDH used as loading control. **E** Conservation analysis of lysine sites at different locations across species and revealed that K5/K393/K453 were highly conserved. **F** Wstern blot was performed to detect the ubiquitination level in KIF20A knock down or negative control cells with co-tranfecting HA-Ub and various mutant plasmids following MG132 treatment (10 μM, 8h), Myc used as loading control. Data were presented as mean±SD, **p* < 0.05, ***p* < 0.01, ****p* < 0.001.
